# Supplementary material for: Application of arginine-doped PEDOT:PSS as a hole transfer layer in perovskite solar cells
Source: Royal Society of Chemistry journal article supplement (doi:10.1039/d3tc02466k), 2023-01-01
Supplement: d3tc02466k1.pdf [file d3tc02466k1.pdf]

## Supporting information

### Application of Arginine-Doped PEDOT:PSS as Hole Transfer Layer in Perovskite Solar Cells

Yuanlin Yang <sup>a</sup>, Yanqing Yao<sup>b</sup>, Ying Li <sup>a</sup>, Xusheng Zhao<sup>b</sup>, Wan Cheng <sup>a</sup>, Banghui  
Chen <sup>a</sup>, Lijia Chen <sup>a\*</sup>, Ping Li<sup>b\*</sup>, Shuhui Tang <sup>b,c</sup>

<sup>a</sup>*College of Physics and Electronic Engineering, Chongqing Normal University,  
Chongqing 401331, China.*

<sup>b</sup>*School of Physics and Electronic Science, Zunyi Normal University, Zunyi 563006,  
China*

<sup>c</sup> *Guizhou Xinmei Nano Technology Co., LTD. Zunyi 564199, China*

\*Corresponding author. E-

mailaddress:ljchen01@cqnu.edu.cn,lip19870212@126.com

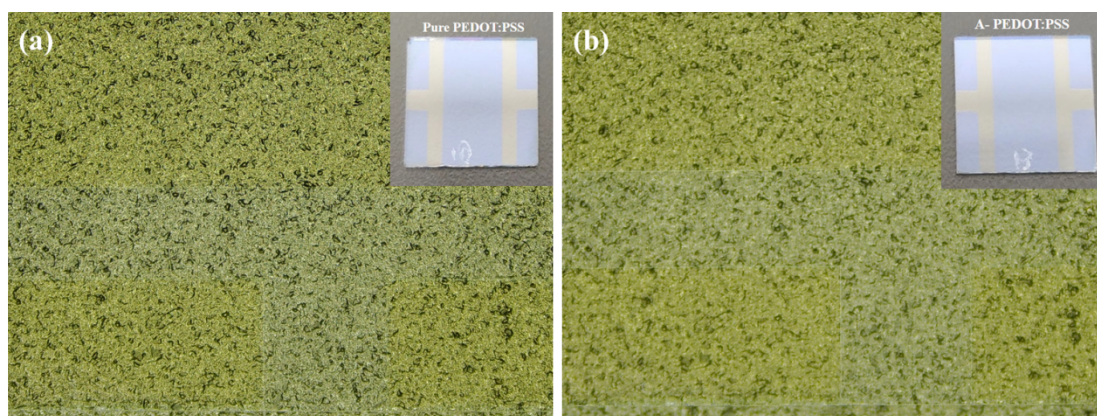

**Fig.S1.** Microscope images of different PEDOT:PSS film: (a) Pure PEDOT:PSS, (c) A-PEDOT:PSS.

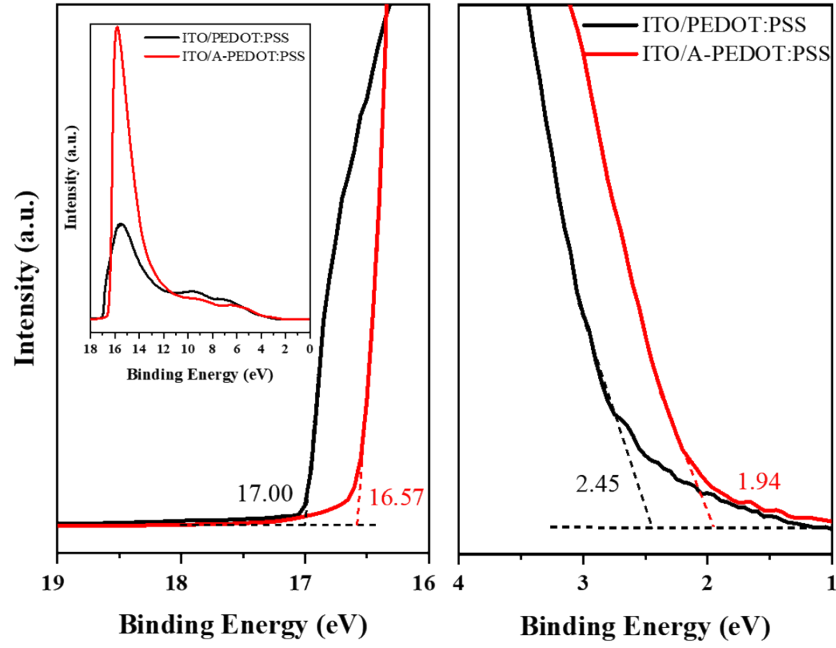

**Fig. S2.** UPS spectra of PEDOT:PSS and A-PEDOT:PSS films

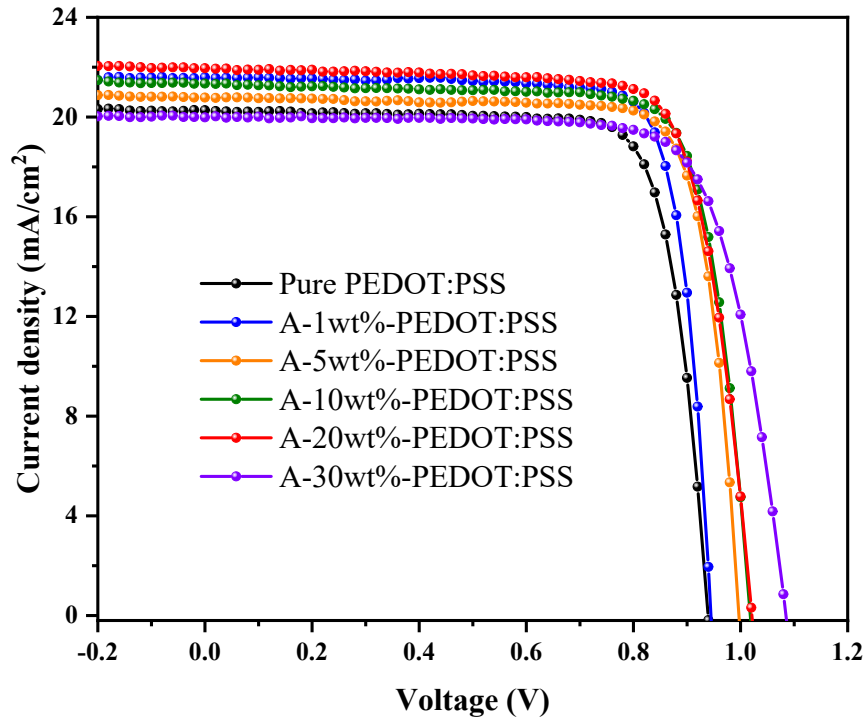

**Fig. S3.** J-V characteristics of inverted PSCs with different concentrations (1, 5, 10, 20, and 30 wt%) of arginine hole transport layers under AM 1.5G illumination of  $100\text{mW}/\text{cm}^2$ .

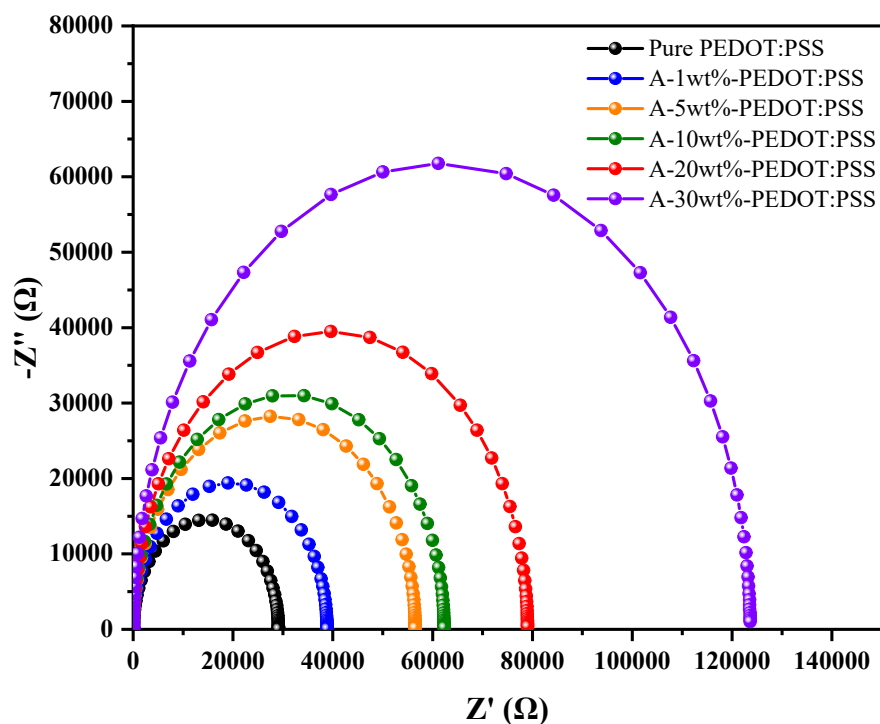

**Fig.S4.** Electrochemical impedance spectroscopy of inverted PSCs with different concentrations (1, 5, 10, 20, and 30 wt%) of arginine hole transport layers under dark conditions.

**Table S1** Parameters of equivalent circuit extracted from the fitting of impedance data in A-PEDOT:PSS device and control device.

| Device             | $R_s$ ( $\Omega$ ) | $R_{rec}$ ( $\Omega$ ) | C (F)                  |
|--------------------|--------------------|------------------------|------------------------|
| Pure PEDOT:PSS     | 66.97              | $2.904 \times 10^4$    | $7.333 \times 10^{-9}$ |
| A-1 wt%-PEDOT:PSS  | 41.48              | $3.882 \times 10^4$    | $7.468 \times 10^{-9}$ |
| A-5 wt%-PEDOT:PSS  | 28.85              | $5.648 \times 10^4$    | $9.129 \times 10^{-9}$ |
| A-10 wt%-PEDOT:PSS | 27.60              | $6.227 \times 10^4$    | $8.944 \times 10^{-9}$ |
| A-20 wt%-PEDOT:PSS | 27.95              | $7.899 \times 10^4$    | $9.357 \times 10^{-9}$ |
| A-30 wt%-PEDOT:PSS | 53.51              | $1.235 \times 10^5$    | $1.067 \times 10^{-8}$ |

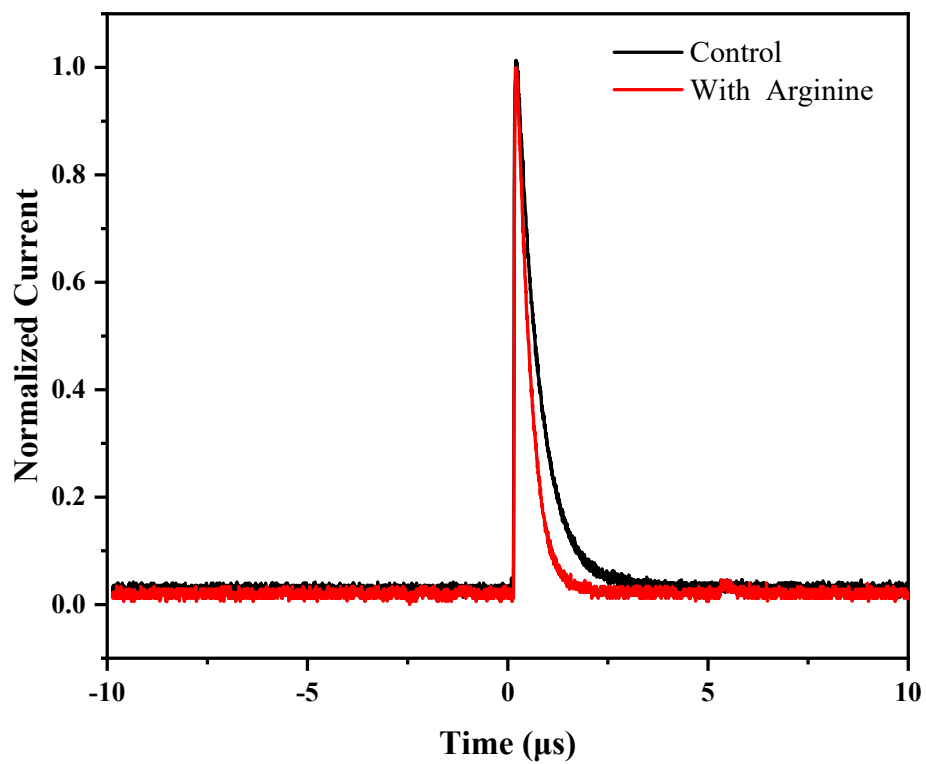

**Fig.S5.** TPC measurements of A-PEDOT:PSS device and control device.
